# Supplementary material for: Superfast structural transformation as a naked-eye detector: conversion of quasi-HKUST to Fe(BTC) for the detection of Fe(iii)
Source: Royal Society of Chemistry journal article supplement (doi:10.1039/d3nj02271d), 2023-01-01
Supplement: d3nj02271d1.pdf [file d3nj02271d1.pdf]

## Superfast Structural Transformation as a Naked-eye Detector: Conversion of Quasi-HKUST to Fe(BTC) for Detection of Fe(III)

Farzaneh Rouhani\*, Mahsa Ghiasvand, Nasser Safari

*Department of Chemistry, Shahid Beheshti University, Tehran 19839-69411, Iran*

### Materials and methods

Iron(III) chloride hexahydrate (97%), trimesic acid (95%), Copper(II) nitrate dehydrate (99%) and required solvents, including Ethyl alcohol (ACS spectrophotometric grade, 95.0%) and methanol (anhydrous, 99.8%), were prepared from Merck and Aldrich companies, and no further purification was required. The Nicolet 100 spectrometer was used to record IR spectra (in KBr) in the range 4000-400  $\text{cm}^{-1}$ . XRD measurements were carried out with a Philips X'pert diffractometer using monochromated Cu- $\kappa\alpha$  radiation ( $\lambda=1.54056\text{\AA}$ ).

### Supplementary spectra (Figure S1-S4 and Table S1)

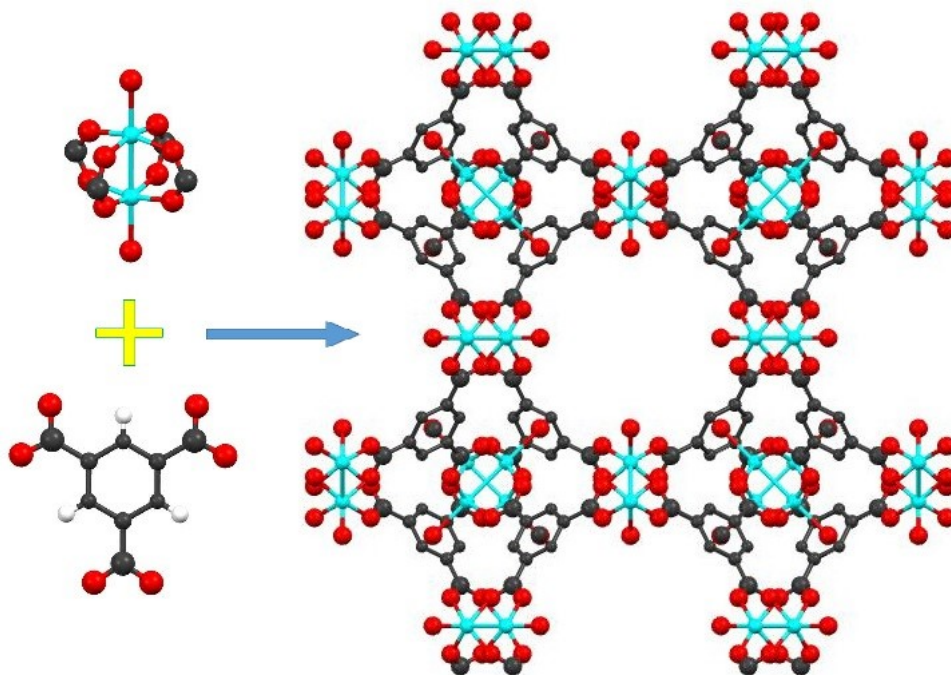

**Fig. S1.** The schematic figure of HKUST and its ingredients. (Color code: blue/Cu, red/O, gray/C and white/H).

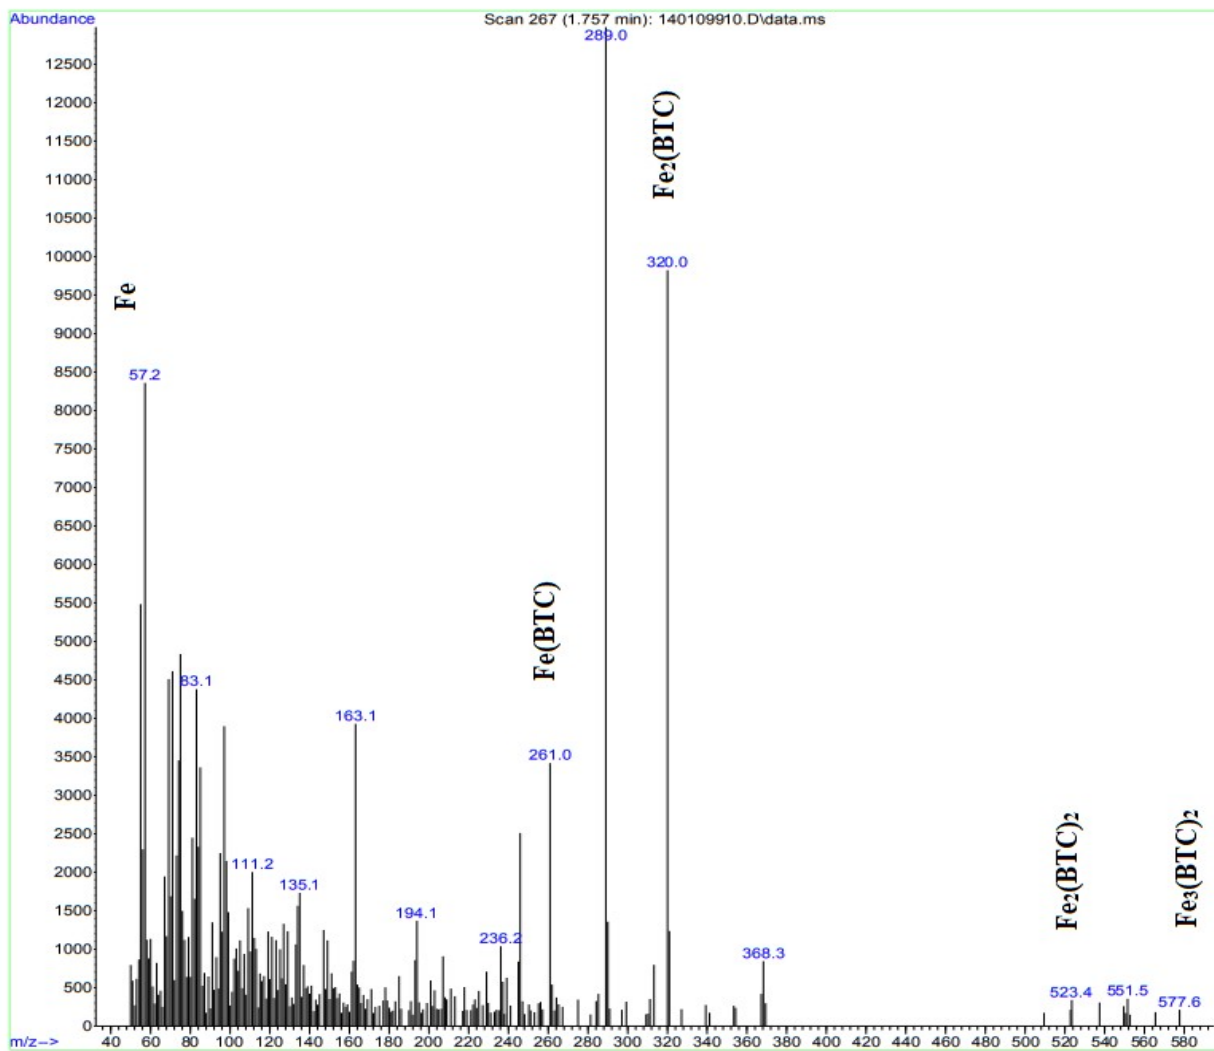

**Fig. S2.** Mass spectroscopy of obtained  $\text{Fe}_3(\text{BTC})_2$

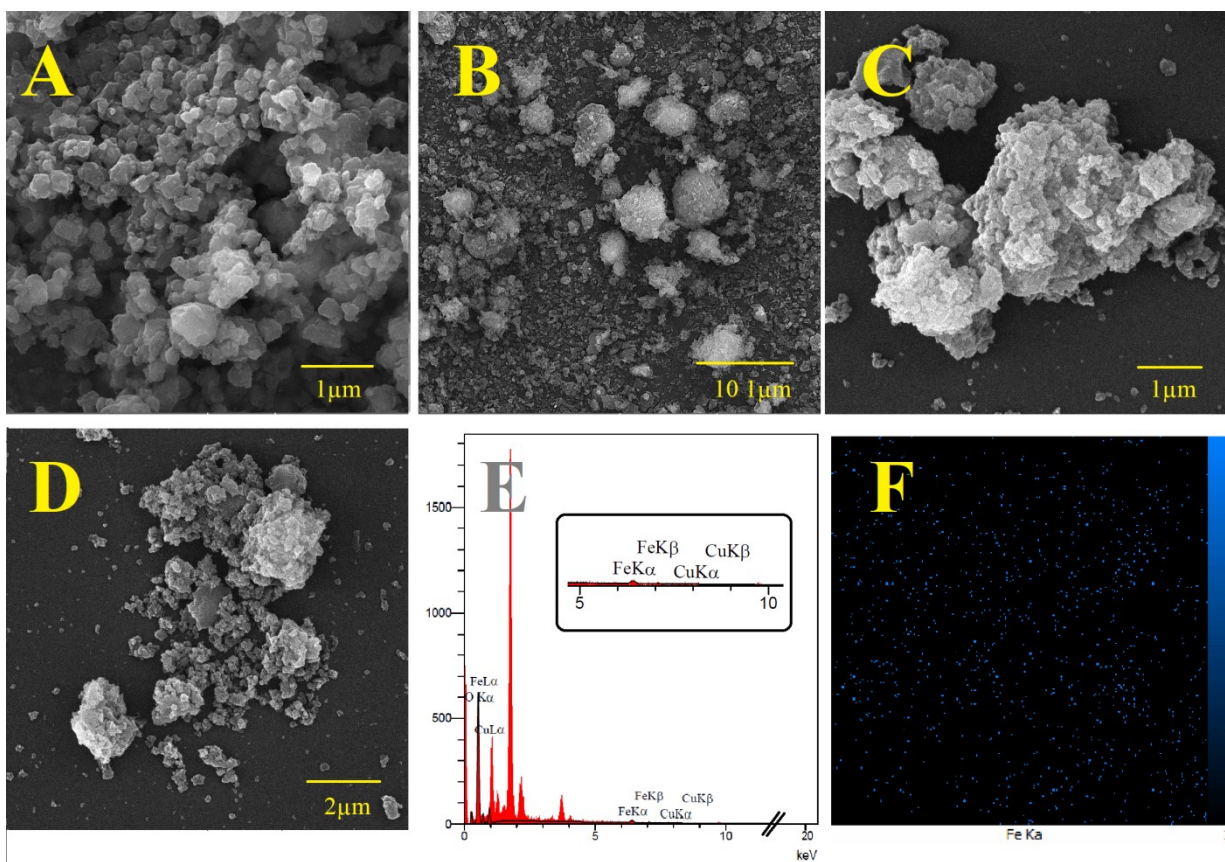

**Fig. S3.** The SEM images of (A) HKUST, (B) and (C) QH-240 and (D) Fe(BTC), (E) EDX analysis result of Fe(BTC) (Magnification of the section related to iron and copper inserted) and (F) EDS mapping of Fe in Fe(BTC).

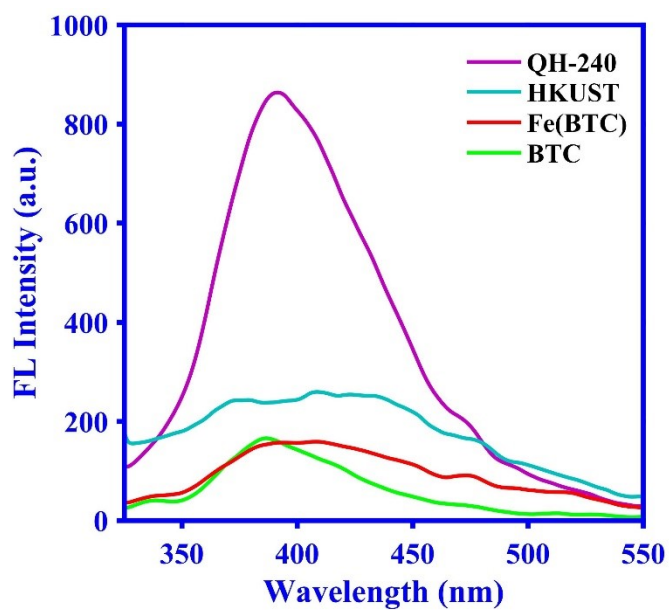

**Fig. S4.** Comparison of fluorescence spectrum of BDC, HKUST, QH-240 and Fe(BTC).

**Table S1.** Summary of reported fluorescence sensors for Fe<sup>3+</sup> in aqueous solution.

| MOF-based sensor                                                                                      | Linear range                     | LOD                     | Reference |
|-------------------------------------------------------------------------------------------------------|----------------------------------|-------------------------|-----------|
| Zr-MOF 85                                                                                             | -                                | $9.10 \times 10^{-7}$ M | 1         |
| Eu-HODA                                                                                               | -                                | 6.4 ppb                 | 2         |
| [Zn <sub>2</sub> (cptpy)(btc)(H <sub>2</sub> O)] <sub>n</sub>                                         | -                                | $4.33 \times 10^{-6}$ M | 3         |
| RhB@DiCH <sub>3</sub> MOF-5                                                                           | 1–10 μM                          | $0.36 \times 10^{-6}$ M | 4         |
| ([Ln <sub>2</sub> (FDC) <sub>3</sub> DMA(H <sub>2</sub> O) <sub>3</sub> ]·DMA·4.5H <sub>2</sub> O     | 0.02-0.1 mM                      | $2.22 \times 10^{-6}$ M | 5         |
| [Eu <sub>2</sub> (pdba) <sub>3</sub> (H <sub>2</sub> O) <sub>3</sub> ]·2H <sub>2</sub> O <sub>n</sub> | $5 \times 10^{-2}$ - $10^{-6}$ M | $1 \times 10^{-6}$ M    | 6         |
| QH-240                                                                                                | 20–300 nM                        | 20 nM                   | This work |

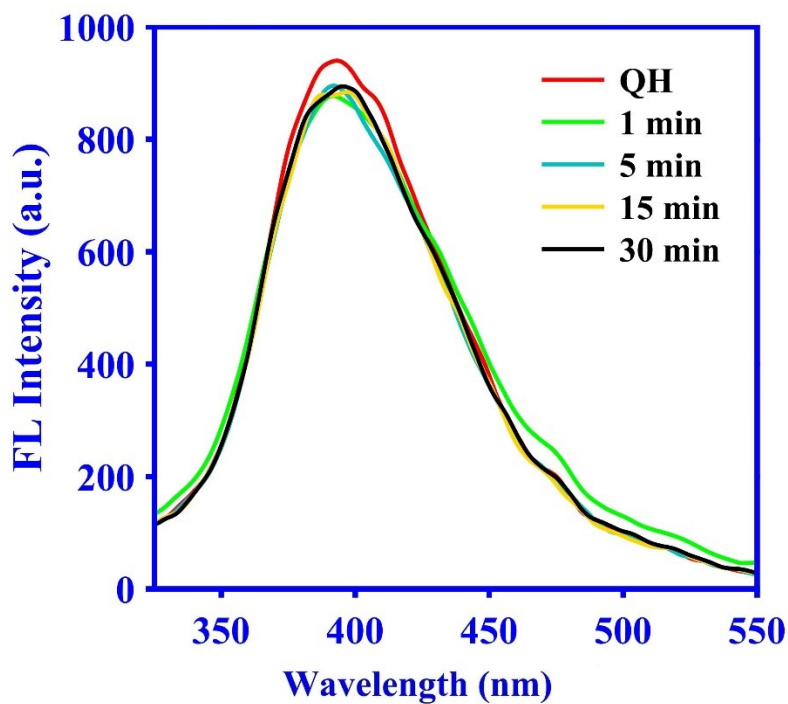

**Fig. S5.** Time-dependent absorption and emission spectra change of QH-240 in the presence of 50 ppb of Fe(III)

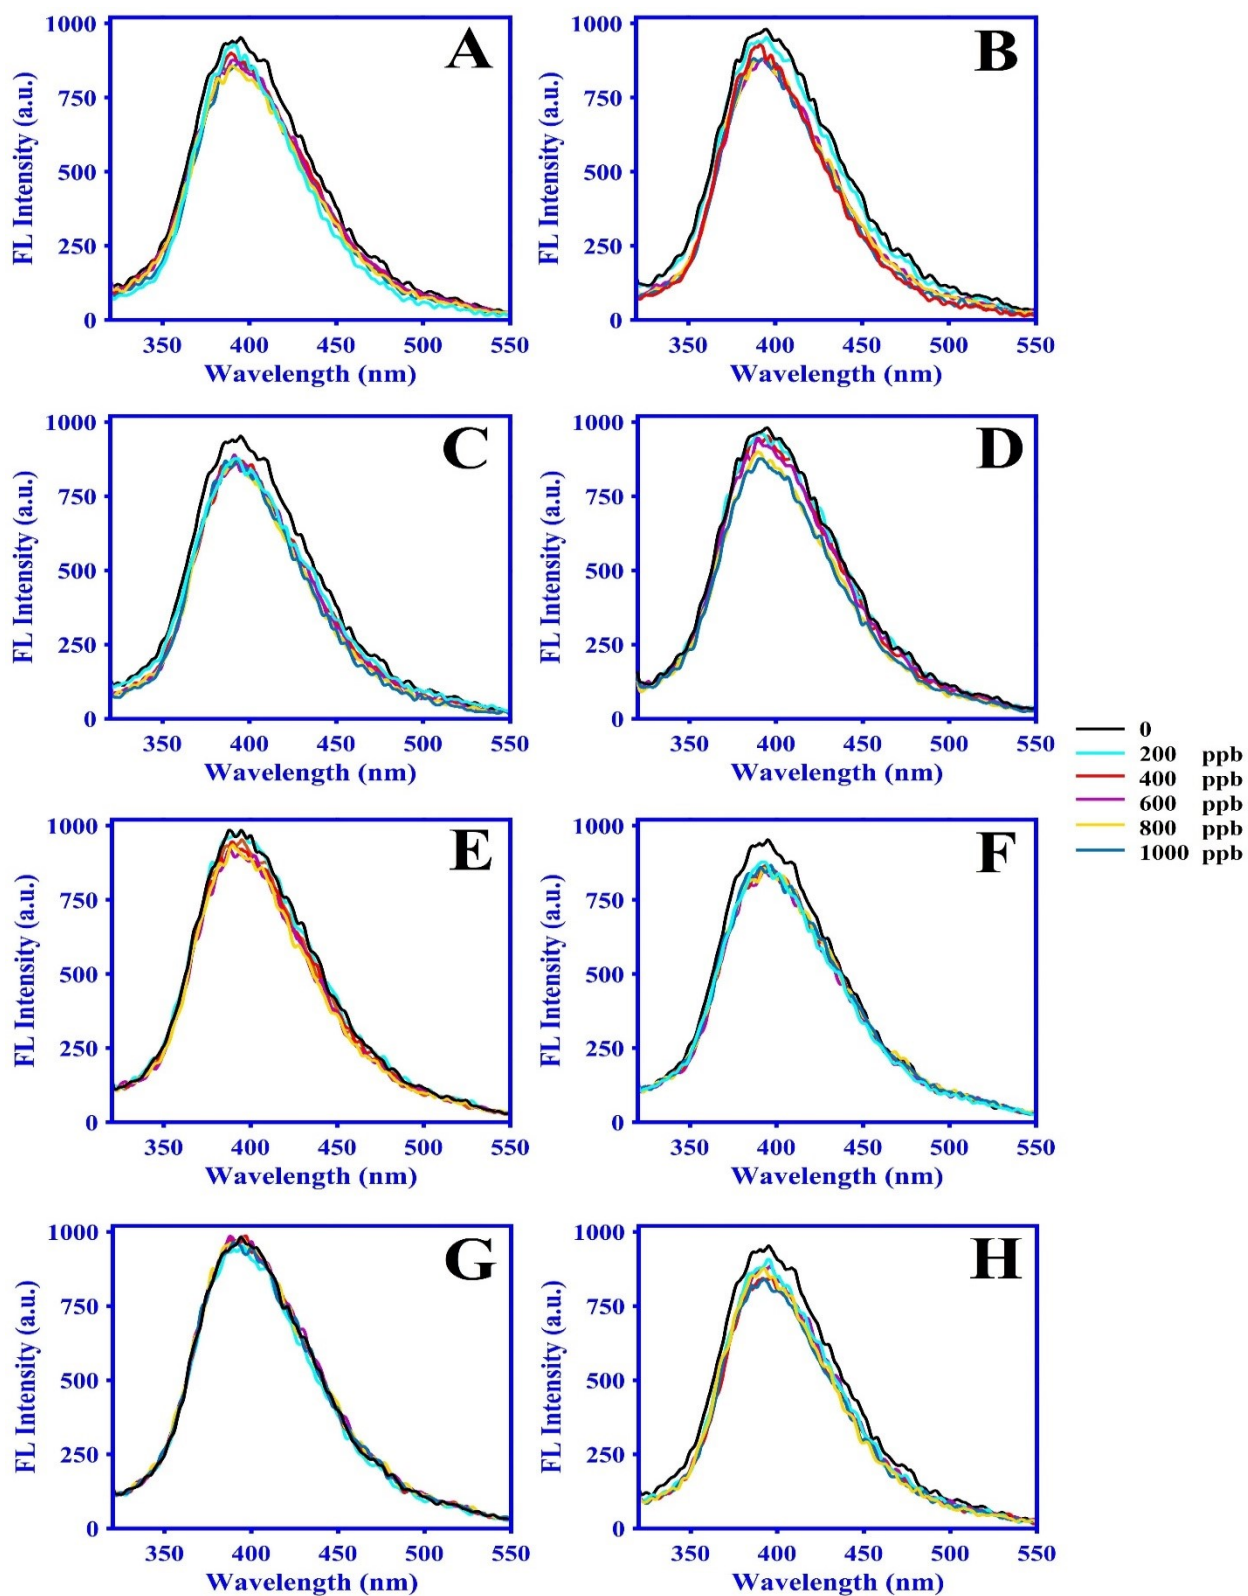

**Fig S6.** Photoluminescence spectra for QH-240 in the presence of different concentration of (A) Cd(II), (B) Co(II), (C) Cr(III), (D) Fe(II), (E) Hg(II), (F) Ni(II), (G) Pb(II), (H)Zr(IV).



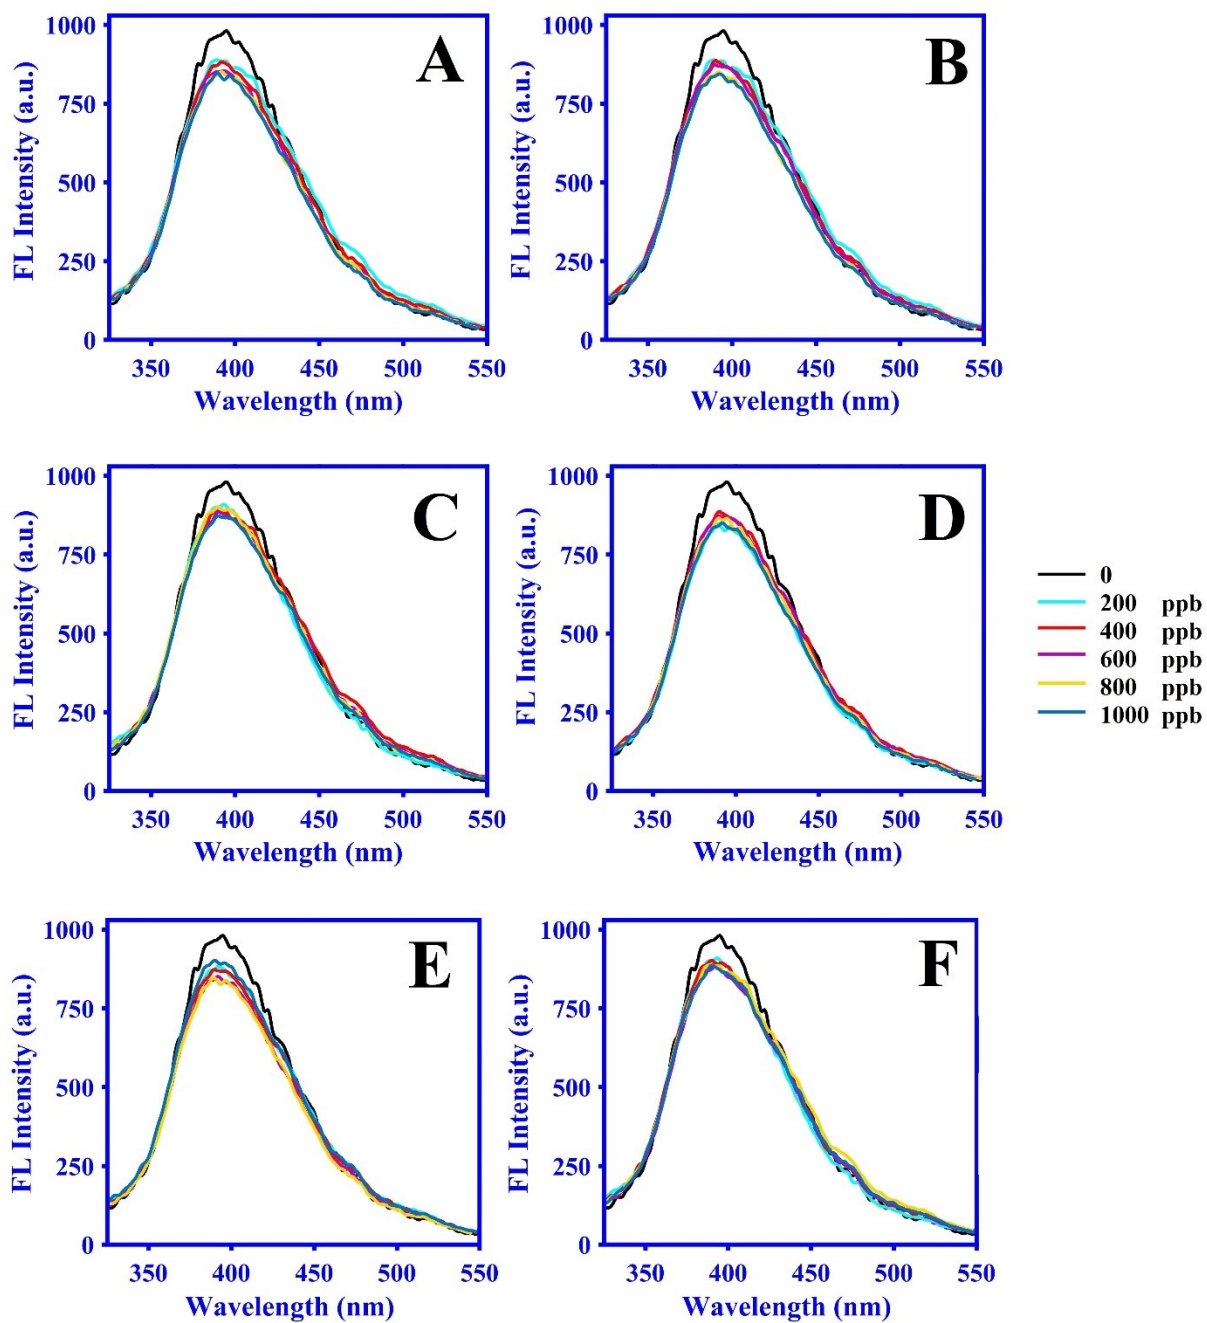

**Fig S7.** Photoluminescence spectra for QH-240 in the presence of different concentration of (A) Li(I), (B) Ba(II), (C) Ca(II), (D) Cu(II), (E) Mg(II), (F) Mn(II).

#### Section D. Reference of supporting information.

1. A. Das and S. Biswas, *Sensors and Actuators B: Chemical*, 2017, **250**, 121-131.
2. J. Wang, M. Jiang, L. Yan, R. Peng, M. Huangfu, X. Guo, Y. Li and P. Wu, *Inorganic chemistry*, 2016, **55**, 12660-12668.

3. H. Chen, P. Fan, X. Tu, H. Min, X. Yu, X. Li, J. L. Zeng, S. Zhang and P. Cheng, *Chemistry–An Asian Journal*, 2019, **14**, 3611-3619.
4. L. Guo, Y. Liu, R. Kong, G. Chen, Z. Liu, F. Qu, L. Xia and W. Tan, *Analytical chemistry*, 2019, **91**, 12453-12460.
5. L. Li, Q. Chen, Z. Niu, X. Zhou, T. Yang and W. Huang, *Journal of Materials Chemistry C*, 2016, **4**, 1900-1905.
6. H. Li, Y. Han, Z. Shao, N. Li, C. Huang and H. Hou, *Dalton Transactions*, 2017, **46**, 12201-12208.
